# Supplementary material for: Characterization of molecular scores and gene expression signatures in primary breast cancer, local recurrences and brain metastases
Source: BMC Cancer. 2019 Jun 7;19:549. doi: 10.1186/s12885-019-5752-8 (PMC6556009; doi:10.1186/s12885-019-5752-8)
Supplement: Supplementary file 1 — Gene Identifications, Categories and Score affiliations. The list contains all the genes (gene symbols and accession numbers). The column marked “Score” indicates for each gene whether it is part of PAM50 (1), RISK (2), RS (3) and/or EP (4). ROR-P is part of PAM50. Reference genes are marked (Ref). (XLS 32 kb) [file 12885_2019_5752_MOESM1_ESM.xls]

## Sheet: Tabelle1
Gene	Accession	Score
ACTB	NM_001101.2	1(Ref), 3(Ref)
ACTR3B	NM_001040135.1	1
AKT1	NM_005163.2
ANLN	NM_018685.2	1
AR	NM_001011645.1	2
AURKA	NM_003600.2	3
AZGP1	NM_001185.2	4
BAG1	NM_004323.3	1, 3
BCL2	NM_000657.2	1, 3
BIRC5	NM_001168.2	1, 3, 4
BLVRA	NM_000712.3	1
CALM2	NM_001743.3	4(Ref)
CCNB1	NM_031966.2	1, 3
CCNB2	NM_004701.3	2
CCNE1	NM_001238.1	1
CCNE2	NM_057735.1	2
CD68	NM_001251.2	3
CDC20	NM_001255.2	1
CDH1	NM_004360.2
CDH3	NM_001793.4	1
CDK1	NM_001786.4	2
CDKN1B	NM_004064.2
CENPF	NM_016343.3	1, 2
CEP55	NM_018131.3	1
CTSL2	NM_001333.3	3
CXXC5	NM_016463.7	1
DHCR7	NM_001360.2	4
EGFR	NM_201282.1	1
ERBB2	NM_004448.2	1, 2, 3
ERBB4	NM_001042599.1	2
ESR1	NM_000125.2	1, 2, 3
EXO1	NM_003686.3	1
FGFR4	NM_002011.3	1
FOS	NM_005252.2
FOXA1	NM_004496.2	1, 2
FOXC1	NM_001453.1	1
GAPDH	NM_002046.3	3(Ref)
GATA3	NM_001002295.1	2
GPR160	NM_014373.1	1
GRB7	NM_005310.2	1, 2, 3
GREB1	NM_014668.3	2
GSTM1	NM_000561.2	3
GUSB	NM_000181.1	2(Ref), 3(Ref)
IL6ST	NM_002184.2	4
KIF20A	NM_005733.2	2
KIF2C	NM_006845.3	1
KRT14	NM_000526.4	1
KRT17	NM_000422.2	1
KRT5	NM_000424.2	1
MAP2K4	NM_003010.2
MAP3K1	NM_005921.1
MAPT	NM_016834.3	1, 2
MDM2	NM_006878.2	1
MELK	NM_014791.2	1
MGP	NM_000900.2	4
MIA	NM_006533.2	1
MKI67	NM_002417.2	1, 2, 3
MLL3	NM_170606.2
MLPH	NM_024101.4	1
MMP11	NM_005940.3	1, 3
MRPL19	NM_014763.3	1(Ref)
MYB	NM_005375.2	2
MYBL2	NM_002466.2	1, 3
MYC	NM_002467.3	1
NAT1	NM_000662.5	1
NDC80	NM_006101.2	1
OAZ1	NM_004152.2	4(Ref)
ORC6	NM_014321.2	1, 2
PGR	NM_000926.4	1, 2, 3
PHGDH	NM_006623.2	1
PIK3CA	NM_006218.2
PIK3R1	NM_181504.2
PRC1	NM_003981.2	2
PSMC4	NM_006503.2	1(Ref)
PTEN	NM_000314.3
PTTG1	NM_004219.2	1
RAB31	NM_006868.3	2
RBBP8	NM_002894.2	2, 4
RPL13A	NM_012423.2	4(Ref)
RPLP0	NM_001002.3	1(Ref), 2(Ref), 3(Ref)
RRM2	NM_001034.1	1
SCUBE2	NM_020974.1	3
SERPINA3	NM_001085.4	2
SF3A1	NM_001005409.1	1(Ref)
SFRP1	NM_003012.3	1
SLC39A6	NM_012319.2	1
SPAG5	NM_006461.3	2
STC2	NM_003714.2	4
TFRC	NM_003234.1	3(Ref)
TMEM45B	NM_138788.3	1
TOP2A	NM_001067.3	2
TYMS	NM_001071.1	1
UBB	NM_018955.2	2(Ref)
UBE2C	NM_007019.2	1, 4
UBE2T	NM_014176.3	1
XBP1	NM_005080.2	2
