# Supplementary material for: Characterization of molecular scores and gene expression signatures in primary breast cancer, local recurrences and brain metastases
Source: BMC Cancer. 2019 Jun 7;19:549. doi: 10.1186/s12885-019-5752-8 (PMC6556009; doi:10.1186/s12885-019-5752-8)
Supplement: Supplementary file 3 — Raw data from NanoString experiment. This spreadsheet contains the raw nCounter data used for the comparisons. (XLS 4183 kb) [file 12885_2019_5752_MOESM3_ESM.xls]

## Sheet: raw_data
sample	sample	sample	sample	Positive_control_gene	Positive_control_gene	Positive_control_gene	Positive_control_gene	Positive_control_gene	Positive_control_gene	Negative_control	Negative_control	Negative_control	Negative_control	Negative_control	Negative_control	Negative_control	Negative_control	Control	Control	Control	Control	Control	Control	Control	Control	Control	Control	Control	Control	Endogenous	Endogenous	Endogenous	Endogenous	Endogenous	Endogenous	Endogenous	Endogenous	Endogenous	Endogenous	Endogenous	Endogenous	Endogenous	Endogenous	Endogenous	Endogenous	Endogenous	Endogenous	Endogenous	Endogenous
id	group	origin	matchedpair	POS_A(128)	POS_B(32)	POS_C(8)	POS_D(2)	POS_E(0.5)	POS_F(0.125)	NEG_A(0)	NEG_B(0)	NEG_C(0)	NEG_D(0)	NEG_E(0)	NEG_F(0)	NEG_G(0)	NEG_H(0)	ACTB	CALM2	GAPDH	GUSB	MRPL19	OAZ1	PSMC4	RPL13A	RPLP0	SF3A1	TFRC	UBB	ACTR3B	AKT1	ANLN	AR	AZGP1	BAG1	BCL2	BIRC5	BLVRA	CCNB1	CCNB2	CCNE1	CCNE2	CD68	CDK1	CDC20	NDC80	CDH1	CDH3	CDKN1B
sampleid	samplegroup	sampleorigin	samplematchedpair	ERCC_00117.1	ERCC_00112.1	ERCC_00002.1	ERCC_00092.1	ERCC_00035.1	ERCC_00034.1	ERCC_00096.1	ERCC_00041.1	ERCC_00019.1	ERCC_00076.1	ERCC_00098.1	ERCC_00126.1	ERCC_00144.1	ERCC_00154.1	NM_001101.2	NM_001743.3	NM_002046.3	NM_000181.1	NM_014763.3	NM_004152.2	NM_006503.2	NM_012423.2	NM_001002.3	NM_001005409.1	NM_003234.1	NM_018955.2	NM_001040135.1	NM_005163.2	NM_018685.2	NM_001011645.1	NM_001185.2	NM_004323.3	NM_000657.2	NM_001168.2	NM_000712.3	NM_031966.2	NM_004701.3	NM_001238.1	NM_057735.1	NM_001251.2	NM_001786.4	NM_001255.2	NM_006101.2	NM_004360.2	NM_001793.4	NM_004064.2
S131	Brain metastasis	primary	P31	15448	6332	1892	356	44	22	1	1	1	0	13	6	0	1	6206	877	2905	47	69	378	118	573	4260	87	143	448	8	721	32	46	236	110	29	54	123	101	34	39	11	70	49	48	13	254	35	57
S147	Brain metastasis	metastasis	M23	26805	10322	3016	617	77	35	9	2	5	4	10	7	4	1	4539	2033	5925	330	197	974	274	1906	3996	137	709	1340	12	714	59	5114	13165	39	36	165	337	117	41	99	32	94	81	100	20	1118	200	65
S159	Brain metastasis	metastasis	M34	26714	9593	2766	620	91	29	3	4	5	2	9	6	4	1	12128	10641	7643	274	499	2528	977	745	7773	396	990	3121	18	6852	229	469	1424	151	42	543	435	540	191	91	668	145	1080	241	116	7204	27	57
S119	Brain metastasis	primary	P20	32810	11295	3368	761	120	61	7	1	4	1	17	7	1	6	14855	2835	5487	134	217	1524	381	1667	7571	227	365	2131	16	1924	47	255	1243	128	110	140	420	130	55	94	26	271	62	109	21	645	249	160
S132	Brain metastasis	primary	P32	22076	8979	2771	538	59	33	2	4	6	2	10	2	1	0	2294	372	1302	40	62	229	122	608	2560	66	131	275	7	707	87	65	2476	50	37	38	135	85	11	89	17	16	46	286	23	355	66	28
S148	Brain metastasis	metastasis	M24	28409	10823	3209	730	100	50	9	6	8	4	9	8	3	2	14058	10724	28205	414	702	3018	4311	2433	19719	670	8007	3695	45	4594	217	300	6834	148	224	612	2056	697	440	583	180	147	476	374	119	6071	657	178
S160	Brain metastasis	metastasis	M35	35347	12503	3666	788	130	71	15	8	3	1	14	8	4	1	16824	3249	9422	366	200	2825	609	1225	10901	504	645	4652	44	1693	383	322	1756	117	39	807	538	590	246	41	145	271	1004	780	57	6878	246	351
S133	Brain metastasis	primary	P33	24196	9804	3233	665	73	36	8	2	7	2	10	9	1	8	10440	4364	6966	347	522	2761	593	2016	10693	419	491	3055	21	2855	218	4268	6799	69	54	1243	650	801	257	63	175	248	482	343	95	2106	62	185
S120	Brain metastasis	primary	P21	32185	11268	3317	691	118	60	10	9	4	1	6	9	3	6	24302	6414	5435	363	205	1820	829	2326	7641	393	473	2052	200	2186	151	19	43777	203	115	133	1125	168	45	187	108	491	89	408	79	1771	3	132
S149	Brain metastasis	metastasis	M25	23701	9110	2766	604	58	43	3	8	5	4	11	11	1	3	12209	6936	14846	309	538	3359	1292	3445	14084	667	851	927	34	1965	299	1554	11764	139	357	514	784	713	126	86	351	407	497	658	62	5188	32	374
S161	Brain metastasis	metastasis		31338	11103	3142	710	108	59	16	4	4	2	11	5	0	1	4768	1322	4662	632	185	1096	481	1423	9231	312	566	1331	32	1933	160	1249	7730	31	32	364	741	239	60	45	111	79	141	237	23	1669	15	118
S134	Brain metastasis	primary	P34	25209	10480	3171	705	81	55	4	4	2	1	9	7	1	4	3910	618	1165	67	84	348	182	1057	1889	110	139	419	11	640	24	47	1155	33	147	34	152	33	29	29	18	91	48	34	11	312	37	153
S121	Brain metastasis	primary	P22	38786	13351	4006	878	127	52	13	2	5	3	17	10	2	2	15271	4558	7791	189	283	1262	528	2899	9434	397	426	2257	29	2454	77	398	15634	88	103	307	448	169	59	58	72	661	115	117	30	1957	65	157
S150	Brain metastasis	metastasis	M26	31419	11467	3506	754	105	66	9	7	3	5	16	7	4	0	20246	2564	15675	6096	251	3158	810	1280	6990	407	949	4159	30	3895	241	2141	6994	44	42	992	1554	553	272	170	104	173	477	212	70	2444	44	111
S162	Brain metastasis	metastasis	M36	34208	12055	3539	799	111	82	11	13	6	6	11	12	0	3	12145	12154	41149	259	345	1296	840	6298	20810	496	947	7375	144	779	95	46	34	68	1503	613	338	287	106	85	82	311	229	362	111	2962	75	587
S135	Brain metastasis	primary	P35	23085	9164	2831	560	78	42	9	3	6	2	9	6	0	3	9428	1611	4116	101	122	1097	358	795	4404	275	344	3043	22	1015	193	230	176	100	111	395	1277	583	114	37	102	388	586	385	34	2445	75	239
S151	Brain metastasis	metastasis	M27	27544	10434	3015	642	92	37	17	9	6	2	10	8	5	4	8222	3194	14031	313	364	3476	1218	2081	17224	309	871	3691	25	1207	97	147	2488	101	136	485	1094	506	64	93	172	454	309	189	60	1981	116	181
S122	Brain metastasis	primary	P23	31881	10958	3327	756	95	42	15	8	7	4	13	2	4	1	15701	9951	13173	1360	386	2777	588	2301	10696	403	1077	2976	28	2503	247	780	7390	120	73	554	598	454	107	197	187	485	194	607	61	4687	740	143
S163	Brain metastasis	metastasis		28915	9567	2814	599	99	52	7	8	2	0	14	7	2	3	7560	3116	8025	520	154	826	1339	8219	4816	297	165	3621	10	1507	34	70	122	389	402	55	908	128	43	29	53	81	63	66	18	3897	7	341
S137	Brain metastasis	primary	P36	25265	10182	3176	701	88	32	10	4	12	2	15	7	3	1	10280	2553	16686	164	243	813	722	3907	13693	323	235	3101	74	844	74	43	41	90	702	325	273	211	67	47	57	265	113	188	81	1860	103	429
S152	Brain metastasis	metastasis	M28	32075	11650	3407	720	92	46	12	2	5	4	10	7	3	3	5611	968	10537	87	255	809	319	3043	7498	184	624	740	100	1016	188	9	5708	86	458	188	197	376	45	355	60	69	199	378	51	1262	637	210
S164	Brain metastasis	metastasis		34421	12066	3475	786	106	48	9	3	3	4	8	13	1	2	5066	1570	5236	153	170	1164	448	2006	15954	164	256	907	21	817	40	233	2491	40	612	85	617	112	42	19	35	179	71	106	23	510	43	95
S123	Brain metastasis	primary	P24	34374	12002	3504	772	105	66	4	5	5	2	9	4	3	2	6845	1113	7045	96	243	467	1123	1620	3098	127	2020	739	14	1932	48	49	860	38	23	61	1068	204	66	143	71	81	114	87	26	895	55	65
S141	Brain metastasis	primary	P37	20495	8189	2546	560	66	40	8	5	3	1	8	12	1	4	5660	4085	5875	296	191	1170	398	1851	7026	288	221	1975	21	2192	63	62	4108	422	167	121	822	214	37	55	60	126	110	67	28	1009	10	32
S153	Brain metastasis	metastasis		31958	11925	3766	817	100	56	8	8	6	5	15	11	5	2	6051	6566	12769	500	276	2547	571	1493	10540	296	324	4474	59	2388	174	555	2152	73	351	885	698	634	244	148	190	151	333	340	153	4640	43	541
S165	Brain metastasis	metastasis		32712	11107	3369	705	107	65	6	10	3	0	12	10	1	0	5901	2440	6735	84	217	574	230	1903	7404	222	578	715	22	1691	86	167	2005	31	33	306	390	149	20	37	86	134	120	110	26	421	51	122
S124	Brain metastasis	primary	P25	37490	13012	3923	786	105	59	11	5	6	3	17	11	1	3	5383	1083	945	58	50	502	123	863	2273	100	106	634	6	295	7	80	147	15	55	9	118	24	9	18	7	234	9	20	3	90	6	74
S142	Brain metastasis	primary	P38	9981	3913	1208	257	42	11	5	1	2	2	5	2	1	0	1991	909	1143	51	58	290	186	583	1981	89	80	745	10	365	18	116	741	26	217	91	104	52	29	11	11	51	39	36	8	464	39	45
S154	Brain metastasis	metastasis	M29	27146	9925	3003	663	96	53	9	8	3	3	8	6	3	6	15355	3005	17032	382	288	1956	478	1144	11514	813	635	1976	23	1810	95	472	2108	65	36	451	725	613	85	64	95	216	306	947	80	1072	317	118
S166	Brain metastasis	metastasis	M37	33380	11385	3420	708	111	58	7	9	8	4	14	7	0	2	13207	7115	8838	150	428	1751	574	2325	11720	526	1126	2436	52	2214	138	794	731	64	66	842	549	463	91	98	179	411	280	358	49	795	44	184
S125	Brain metastasis	primary	P26	32610	11546	3323	714	88	55	14	5	6	4	11	4	1	4	13798	2652	3464	12427	187	1484	418	1477	6542	169	384	2595	12	1852	57	752	15394	29	59	296	1313	146	62	48	27	200	113	74	13	1890	50	53
S155	Brain metastasis	metastasis	M30	32822	12066	3701	783	110	46	8	6	9	10	11	8	2	5	10961	5462	7563	117	281	2187	591	1407	12159	338	686	6091	146	1219	213	2	39918	236	117	465	248	441	158	1350	77	146	277	2116	151	1349	496	202
S126	Brain metastasis	primary	P27	37057	12827	3894	770	122	70	13	3	5	2	9	12	0	1	859	176	235	26	12	79	46	209	924	23	30	118	5	129	6	10	112	43	103	30	48	17	1	9	8	13	11	11	7	90	7	16
S144	Brain metastasis	metastasis	M20	23730	10027	3222	647	59	44	14	2	7	3	14	11	3	4	9995	5084	10976	128	388	2083	1033	2614	9977	336	2526	5143	30	2797	125	283	7632	348	17	384	594	586	190	281	83	233	169	519	93	1588	348	114
S156	Brain metastasis	metastasis	M31	29388	10997	3245	651	105	50	5	2	0	1	3	12	0	1	10053	3488	7731	260	208	1545	971	1219	13439	476	495	2501	24	4046	187	172	3685	621	207	257	340	838	194	206	111	132	553	503	50	1946	40	464
S127	Brain metastasis	primary	P28	32251	11310	3380	721	106	63	10	7	2	5	8	5	2	3	20183	5986	7720	99	245	2666	519	4779	10383	413	1272	2513	111	1230	296	17	4476	139	286	333	206	916	135	355	137	431	332	398	297	1745	529	136
S129	Brain metastasis	primary	P29	36071	12744	3865	792	105	70	15	2	5	4	16	10	1	3	17766	3878	5313	152	219	1724	422	2270	12274	426	438	1837	22	1757	38	331	487	73	140	107	406	241	45	61	58	191	113	348	46	792	159	128
S145	Brain metastasis	metastasis	M21	29591	11537	3662	787	100	72	8	11	14	5	13	12	1	3	14562	4744	7800	276	215	1141	479	1935	6524	273	408	2144	210	1530	179	12	43157	124	42	189	926	341	62	199	129	495	183	528	105	1392	5	140
S157	Brain metastasis	metastasis	M32	32183	12088	3618	739	98	49	10	6	6	5	13	2	3	3	8710	2047	15150	187	223	1713	485	7280	31486	604	1015	3700	99	3592	362	374	8720	595	34	245	534	565	209	66	103	101	285	1306	140	2394	554	91
S167	Brain metastasis	metastasis	M38	25523	10659	3150	651	84	54	11	3	3	4	12	5	4	3	9770	2539	10799	144	186	1309	486	2005	6431	445	471	2452	23	1735	199	279	3320	70	24	188	461	351	98	78	97	142	223	558	114	1151	246	106
S130	Brain metastasis	primary	P30	31527	11626	3466	707	102	65	10	2	5	2	8	4	5	2	11731	5390	10361	256	442	2195	412	1721	21393	507	450	6647	316	1054	188	7	40050	156	145	481	245	448	172	1293	80	122	339	1804	73	976	290	126
S146	Brain metastasis	metastasis	M22	26036	10575	3266	633	71	49	4	8	3	2	7	3	0	1	5834	1849	5754	116	168	733	339	1359	3721	187	391	1373	21	1431	51	64	5318	54	78	120	267	111	27	44	26	184	70	75	17	593	45	65
S158	Brain metastasis	metastasis	M33	14951	5345	1595	333	39	17	5	1	0	2	5	4	1	1	7103	3815	15331	114	405	1757	586	902	10429	269	401	2085	16	1476	83	1895	5238	27	33	732	283	515	115	105	64	120	359	172	83	1068	42	72
S168	Brain metastasis	metastasis		28177	11827	3507	734	91	56	10	7	3	4	12	13	1	1	1911	381	1408	71	33	308	85	428	1488	68	62	522	6	324	49	2	288	19	82	73	77	56	17	56	21	156	43	48	22	23	4	61
S35	Control	primary		29374	10916	3503	713	78	55	12	10	8	5	16	9	4	1	7916	4621	8815	123	235	1047	583	625	3216	274	450	3294	31	667	238	27	1363	62	40	476	175	320	95	269	132	193	453	434	134	509	97	108
S36	Control	primary		20488	8219	2571	564	66	45	6	2	6	4	11	12	4	2	12649	3324	4207	172	192	1644	439	1667	6947	291	613	2144	24	1283	37	203	591	52	283	67	728	224	65	43	46	402	125	99	28	679	41	183
S37	Control	primary		20354	8107	2600	552	40	31	11	6	10	3	9	5	1	4	4750	1191	1742	86	63	679	198	1657	4175	220	145	1129	17	579	14	289	1304	52	252	33	128	74	12	23	9	98	27	44	15	103	42	159
S39	Control	primary		21331	8797	2735	564	83	51	8	4	2	1	8	10	4	1	5640	2091	2196	155	120	905	222	1437	4589	268	143	1625	21	1014	6	365	4097	63	368	6	164	45	14	12	8	87	12	22	3	400	19	230
S40	Control	primary		18587	7877	2556	460	52	22	7	7	2	2	5	7	3	1	1853	3759	2552	134	141	1125	245	1539	3294	342	100	2528	20	872	6	12	9370	62	485	30	155	115	17	19	13	49	28	25	5	1052	4	14
S42	Control	primary		19100	8273	2678	435	59	29	7	6	4	3	10	6	2	1	9527	4362	5543	119	230	2395	511	1618	4401	398	390	2179	11	1603	41	733	5611	76	625	133	672	219	52	27	29	148	105	50	34	2207	12	434
S44	Control	primary		11138	4816	1527	321	41	28	9	5	2	1	2	8	0	3	4521	1762	1497	79	96	637	188	630	3008	116	108	1126	19	1261	17	141	3221	134	358	37	261	70	14	22	16	147	54	36	21	730	11	104
S45	Control	primary		13542	6353	1922	367	44	21	5	2	2	2	5	8	0	3	12792	3625	11779	173	437	2160	1585	2038	10914	319	707	2595	47	1125	302	18	2755	160	47	431	289	515	183	437	94	288	407	828	124	897	573	123
S46	Control	primary		18525	8524	2643	533	55	31	7	7	5	1	11	4	2	1	12358	2882	7538	192	248	1825	569	4819	21699	296	768	1011	30	2711	100	539	1733	121	52	541	326	390	100	106	53	250	124	446	59	935	135	107
S47	Control	primary		17331	8486	2786	448	57	31	6	5	2	4	6	9	1	0	7811	3389	4976	178	133	1317	326	939	3029	213	179	1493	14	1451	21	408	9801	51	183	30	310	61	19	35	11	142	44	26	10	1158	11	225
S48	Control	primary		26453	9746	3147	628	73	48	11	5	5	5	10	10	3	1	7316	4696	3023	773	184	1636	539	2296	9639	438	485	3606	44	1421	29	856	11787	135	584	53	1149	142	26	19	25	208	58	72	23	1487	38	398
S49	Control	primary		27775	10239	3206	626	68	55	9	8	7	2	10	7	0	0	6348	5982	14580	151	221	1060	481	1923	12460	279	525	2651	58	1085	78	9	60	79	205	323	245	690	155	632	274	184	612	619	161	1383	262	525
S50	Control	primary		33861	12747	3861	786	101	63	9	4	5	5	16	11	3	4	10622	3139	3218	250	195	1821	412	3229	8298	496	261	3079	35	1373	9	282	4369	94	574	15	294	80	15	35	12	338	14	26	10	266	37	300
S51	Control	primary		29448	11352	3376	683	96	59	9	9	6	6	9	20	5	1	8731	3496	2818	466	235	2132	706	1185	6203	310	171	4671	29	1803	40	440	12048	654	1182	84	826	226	50	50	33	480	125	100	20	2685	14	124
S52	Control	primary		26611	10023	2980	647	100	43	2	9	2	5	12	7	5	2	7352	4601	6629	312	200	1644	401	2071	7363	434	149	3392	23	1239	47	371	24627	58	503	122	1486	195	35	36	44	197	108	92	26	1150	12	169
S53	Control	primary		33303	12472	3804	793	108	68	10	6	6	7	15	5	0	5	8433	1704	1589	183	104	1029	252	1718	4940	245	92	1633	21	959	3	301	4846	35	354	12	297	51	8	28	7	287	19	17	9	342	22	173
S55	Control	primary		32000	12023	3593	773	123	56	9	8	10	4	14	14	1	1	9093	5993	10621	349	337	1555	614	2226	7905	349	160	3290	55	2500	66	288	3017	521	1081	202	667	365	114	58	50	123	293	143	53	1985	17	527
S56	Control	primary		31245	12076	3760	783	126	42	4	4	6	3	10	15	2	9	11806	3346	3620	260	219	1515	514	2055	6220	445	249	2264	21	1674	43	445	4977	107	355	67	241	143	40	31	29	184	82	47	19	164	71	415
S57	Control	primary		30257	11513	3401	717	93	58	14	5	9	3	11	10	6	1	9219	3811	2772	237	176	1164	518	2013	6063	271	221	2611	30	2796	21	923	5955	77	361	84	675	176	30	43	39	265	84	91	27	1013	50	238
S58	Control	primary		29257	10982	3392	724	96	57	17	8	11	3	15	5	5	3	10455	4616	9598	238	209	2376	683	7392	17931	298	302	4500	50	2161	55	604	8400	68	879	298	655	481	47	37	53	179	156	144	26	2719	105	388
S59	Control	primary		27102	10625	3205	668	71	58	2	12	14	5	13	9	5	3	6780	13855	5620	284	329	2560	664	2384	6737	414	229	5738	31	2133	38	621	44188	191	974	130	1222	284	45	29	48	229	127	113	27	2441	7	493
S60	Control	primary		30214	11457	3599	820	92	57	7	4	3	4	8	11	4	3	13597	5635	5351	283	224	2120	653	2085	10494	562	517	3261	34	1906	48	1605	14512	85	533	66	1476	120	38	24	38	386	69	72	19	1488	90	285
S61	Control	primary		28663	10807	3205	680	96	55	7	5	2	2	9	6	0	3	9083	1789	15364	192	129	647	343	1085	4804	278	862	1143	49	791	108	3	652	55	823	204	231	201	51	185	289	153	357	166	80	376	254	306
S62	Control	primary		26020	10113	3074	657	93	47	10	8	3	1	9	12	1	1	8866	4961	3543	140	182	1476	381	2132	8069	367	291	2044	24	1505	16	431	9858	58	318	31	606	72	16	27	18	151	35	33	17	884	38	156
S63	Control	primary		25363	9918	2988	602	94	40	1	6	2	3	10	9	1	2	10332	2061	4061	152	137	1519	393	1601	6231	265	665	2537	23	2845	57	325	934	51	200	117	344	251	55	54	72	663	102	67	25	638	26	156
S64	Control	primary		21610	8065	2539	497	66	37	9	3	2	0	7	3	0	0	6775	2195	2019	227	126	1461	376	1268	6130	272	165	2184	31	1641	10	1025	6446	106	573	30	362	83	12	40	9	113	26	18	10	1145	9	299
S65	Control	primary		38154	13965	4174	861	127	81	14	10	3	11	13	13	4	5	21424	8441	7150	378	406	3473	1113	2779	7263	844	485	5774	46	3786	84	799	8577	309	950	238	1024	412	88	110	106	515	237	214	54	6095	16	258
S66	Control	primary		25363	9429	2765	616	76	52	4	7	3	5	17	5	0	2	5202	2549	1944	190	99	490	175	843	2108	158	184	1724	30	709	17	634	6843	34	199	37	203	76	6	17	20	66	52	35	12	574	15	111
S67	Control	primary		31605	12078	3576	775	111	52	12	7	7	9	8	9	5	2	11936	5648	5609	245	220	2418	630	3167	10208	468	369	4674	36	1521	73	487	6507	121	600	285	754	503	89	76	110	273	399	188	49	1556	36	325
S68	Control	primary		25696	10473	3291	664	112	49	10	7	7	5	7	6	0	2	10190	3360	3584	223	132	1966	399	5633	10143	257	329	2619	35	1220	27	108	4947	62	439	59	786	90	20	22	31	234	46	53	12	402	32	164
S69	Control	primary		22170	8868	2710	525	66	43	6	7	2	4	9	16	3	1	14172	4374	15107	163	359	1418	934	1638	9504	351	482	2591	71	1133	191	18	118	139	45	1098	284	1014	260	261	103	193	678	1268	226	656	457	199
S70	Control	primary		14106	5771	1618	317	50	38	6	3	2	2	7	1	4	1	5182	1750	1325	86	81	623	147	824	2989	109	80	897	10	512	4	146	910	47	229	14	131	21	9	9	7	78	10	7	1	153	28	95
S72	Control	primary		24178	8534	2135	561	50	38	2	2	2	1	4	0	1	3	3683	1723	1479	94	75	538	302	1329	4867	193	251	1790	18	623	4	83	1918	25	315	17	210	31	5	11	13	155	8	15	10	295	52	73
S73	Control	primary		35339	12337	3617	769	114	50	7	2	4	4	11	5	1	2	14937	3744	7146	385	269	2825	1138	2646	6100	362	548	4228	45	2028	71	64	1050	312	1512	253	913	634	106	59	126	472	281	183	54	2111	56	419
S74	Control	primary		41884	15517	4318	981	125	58	8	2	5	3	9	5	2	1	7022	5775	4432	297	229	1986	423	3758	12961	379	310	3620	30	2419	11	587	23171	135	512	36	839	99	26	26	16	139	31	61	8	867	84	348
S75	Control	primary		39105	14835	4332	976	130	59	9	3	4	5	14	7	4	4	15711	5432	4520	339	270	2030	608	3617	14172	612	384	3691	44	2018	15	610	4520	175	667	49	460	93	18	29	31	529	37	38	13	1025	51	389
S78	Control	primary		37597	14747	3736	886	111	59	8	2	3	1	5	0	2	2	7054	3561	2781	209	154	1132	288	1843	6054	295	169	1472	30	1525	6	610	6544	80	163	7	201	37	7	14	23	134	16	10	9	505	37	215
S79	Control	primary		41067	15813	4450	967	124	54	6	3	2	2	16	2	1	6	16181	7049	4562	223	289	2444	683	1620	7337	375	594	3187	34	2871	62	358	2315	115	565	363	884	487	125	78	115	275	455	275	42	1314	18	349
S80	Control	primary		38002	14977	4222	954	136	56	7	3	4	4	7	6	3	1	14610	5343	5337	327	244	1987	591	2799	8536	485	325	4215	59	2085	18	352	5627	243	967	68	347	122	31	31	27	211	44	48	16	945	177	275
S81	Control	primary		38076	15644	4527	898	113	61	12	0	3	3	7	8	2	1	8838	3622	5822	429	211	2388	958	805	13829	378	1042	2140	132	1942	174	185	1034	53	420	703	1207	556	173	121	95	337	364	314	98	1531	30	243
S82	Control	primary		33958	14031	3943	844	118	47	5	6	1	3	7	3	1	2	10778	12607	9606	139	482	3944	716	3674	11219	622	654	4422	23	2084	71	504	5362	125	642	167	1065	354	57	55	73	317	319	174	72	2714	56	322
S83	Control	primary		30359	12813	3223	792	95	42	5	1	2	0	5	0	2	3	11862	5339	11323	415	509	1728	939	2342	12409	380	512	3582	54	4360	217	263	110	160	44	414	454	632	227	137	132	309	532	394	190	885	580	98
S84	Control	primary		26672	9352	2796	595	68	42	14	6	7	5	10	8	7	1	10435	7048	9521	475	302	2194	807	2379	11717	320	469	5169	41	2420	66	314	2101	106	637	269	1710	599	163	187	93	237	146	272	99	3845	42	180
S98	Local recurrence	Local recurrence	R10	35123	12922	4194	872	113	73	9	5	18	9	25	14	5	6	8522	3533	3080	184	222	1493	589	1777	8627	289	215	4146	33	2740	38	647	3966	175	703	119	909	180	56	51	41	237	130	149	43	1960	20	157
S86	Local recurrence	Local recurrence	R2	29314	9165	2741	575	87	52	4	1	2	3	4	3	1	2	3833	639	2382	100	77	302	156	499	2260	62	66	762	17	550	24	67	760	13	96	39	94	55	7	13	6	103	12	14	8	122	3	61
S99	Local recurrence	Local recurrence	R11	46094	17198	5578	1122	169	75	17	18	16	11	25	25	12	18	20076	9673	14153	523	673	4813	1409	6068	19346	1111	779	7160	61	3960	82	1422	44071	262	664	240	1539	509	146	136	212	431	248	257	86	2834	560	433
S87	Local recurrence	Local recurrence	R3	37325	12365	3427	816	135	71	13	3	4	4	16	5	3	1	9830	2280	4435	346	170	1160	347	1681	9297	242	241	2580	28	2011	25	730	2621	142	271	108	196	152	37	31	38	240	76	82	19	366	10	181
S88	Local recurrence	Local recurrence	R4	44472	14612	4277	1003	135	90	13	7	8	9	8	20	3	4	20533	8047	7537	751	519	4195	1151	3689	11739	693	1081	11888	103	2074	70	2451	24594	269	2370	247	504	428	128	118	135	434	279	203	77	4570	48	389
S101	Local recurrence	Local recurrence	R12	47542	19303	6254	1240	169	99	22	12	14	6	40	16	8	14	19587	7714	8719	237	275	2138	741	3030	10475	456	926	4031	61	2761	44	757	3772	195	437	109	793	115	46	93	56	746	78	104	34	874	60	440
S89	Local recurrence	Local recurrence	R5	38341	13131	3650	836	124	55	13	1	3	3	11	4	2	2	4072	653	2196	98	103	564	226	1234	3322	131	91	896	19	524	12	125	1197	56	365	32	366	59	10	15	22	107	47	23	15	232	6	156
S90	Local recurrence	Local recurrence	R6	30432	11021	2992	704	131	50	6	7	2	2	10	12	3	6	11544	4960	4768	252	393	2058	621	1405	5326	428	359	5052	45	2135	51	749	24378	52	967	163	134	188	41	47	69	336	134	74	59	1944	19	366
S92	Local recurrence	Local recurrence		40776	14518	3906	886	155	58	17	6	3	3	12	5	2	2	12636	3054	19228	281	245	1690	594	1887	8160	313	392	1560	27	2702	43	392	1889	88	863	144	540	275	87	74	27	532	154	120	46	4017	48	369
S102	Local recurrence	Local recurrence	R13	43592	18097	5690	1173	150	75	14	16	9	6	18	14	6	3	5252	1850	2157	176	164	662	251	1163	3625	163	81	1097	18	976	37	149	1589	47	74	42	208	72	16	11	39	127	52	30	10	355	2	100
S103	Local recurrence	Local recurrence	R14	37673	16717	5061	1032	121	86	12	10	9	9	21	12	13	6	19133	5422	11379	414	414	1734	891	2744	10957	490	421	1963	34	2978	144	166	11517	63	138	109	1466	343	100	84	82	196	138	84	42	140	34	281
S104	Local recurrence	Local recurrence	R15	41109	17799	5760	1044	156	82	23	8	19	9	24	30	9	8	15851	6211	8292	1020	506	3046	1275	3587	11711	889	572	3977	96	5433	85	1570	23021	316	891	292	1080	446	76	213	185	288	276	223	84	3497	23	555
S93	Local recurrence	Local recurrence	R7	24652	9460	2617	604	104	30	7	3	3	2	10	7	0	1	7218	3774	6411	262	140	1337	453	2364	10814	313	280	1652	33	1250	63	475	3098	118	165	288	579	373	88	38	71	235	231	183	67	545	35	44
S105	Local recurrence	Local recurrence	R16	35343	14966	4961	959	137	71	11	7	9	9	28	15	6	4	11515	5609	4862	339	369	2254	582	2254	9060	513	307	2501	36	2895	48	395	13803	245	142	62	405	202	56	72	43	270	136	85	23	1274	28	305
S95	Local recurrence	Local recurrence	R8	11149	4175	1137	246	63	21	4	0	1	0	4	1	0	0	5382	826	1614	91	59	399	145	587	2650	60	96	331	9	610	18	137	836	16	32	51	168	39	7	14	5	108	36	23	8	191	36	22
S106	Local recurrence	Local recurrence	R17	40681	18077	5894	1152	159	85	21	10	8	9	27	7	5	7	5303	425	7835	69	152	224	517	679	1841	125	223	234	46	795	48	21	15136	33	69	45	100	46	26	49	11	39	24	333	28	405	108	58
S96	Local recurrence	Local recurrence	R9	33167	12515	3412	729	106	48	8	7	1	4	12	16	2	1	8479	6706	5987	601	317	3079	663	2443	9623	621	248	3422	30	3133	30	976	23723	865	754	115	48	206	55	110	122	292	146	87	50	1382	42	531
S107	Local recurrence	Local recurrence	R18	33559	15308	4884	931	121	64	12	4	3	4	6	12	6	2	5844	2175	7118	183	205	615	446	4722	9168	222	170	988	20	2465	142	609	1564	180	728	1236	819	499	161	60	50	44	278	103	56	1101	24	238
S109	Local recurrence	Local recurrence	R19	34567	15649	5007	944	119	77	16	8	13	9	14	15	4	8	21636	5981	18603	232	300	2458	886	2182	9103	465	672	1970	27	2237	87	493	3932	182	197	236	341	421	90	118	136	388	340	179	80	811	226	251
S85	Local recurrence	Local recurrence	R1	32375	13303	3824	760	113	54	14	7	3	2	10	2	2	2	15003	2992	13118	135	361	1664	900	1573	4150	258	765	2829	28	994	396	6	2979	63	49	648	448	1133	152	282	193	152	358	601	74	2346	721	66
S10	Local recurrence	primary		29763	12929	3958	790	114	67	8	7	3	3	12	16	5	3	14580	10323	9890	343	494	3046	853	2233	10346	457	1477	3316	20	2795	136	294	4891	116	99	312	425	590	234	207	188	368	269	209	77	2596	116	260
S14	Local recurrence	primary	P7	20838	9346	2829	547	73	29	4	4	5	5	8	6	5	4	9594	2366	5854	163	218	1366	710	2079	11566	344	210	2056	17	2220	114	637	935	263	254	486	553	1300	96	12	109	186	525	313	71	1351	17	32
S15	Local recurrence	primary		29646	10287	3039	748	73	34	7	4	3	4	14	4	1	4	6560	1169	2423	107	70	674	166	901	3207	114	307	1906	36	1394	50	103	1114	35	47	113	178	244	35	94	33	188	97	113	17	611	113	56
S16	Local recurrence	primary	P8	34557	12279	3349	708	108	50	7	5	3	3	9	6	1	4	12417	2069	2845	175	127	1256	311	2221	6764	374	241	1981	30	939	29	137	1763	63	270	58	286	78	23	33	20	406	27	41	17	359	91	194
S17	Local recurrence	primary	P9	37079	13294	4126	888	120	47	12	3	5	7	15	9	2	5	5120	2277	3958	187	145	1018	365	1769	8127	302	164	2000	26	1399	32	387	16301	104	678	88	1259	198	53	53	51	118	104	100	34	688	7	110
S18	Local recurrence	primary		36596	13108	4028	863	120	60	10	2	3	5	4	1	2	2	8064	1691	1736	133	82	606	223	996	3883	222	109	1093	10	860	17	198	4315	85	237	44	162	81	20	18	21	115	31	27	4	215	29	63
S20	Local recurrence	primary	P10	34737	13562	3730	828	142	53	8	7	6	4	13	3	2	1	8349	1850	2533	192	193	714	490	1398	6219	150	210	969	40	3325	46	490	5010	150	694	175	802	155	81	78	40	153	141	148	34	1782	12	236
S21	Local recurrence	primary	P11	29735	11105	3360	689	93	47	9	5	4	1	11	10	1	3	7451	5977	4733	303	284	2130	494	2161	6153	516	153	3955	38	1940	33	913	15935	156	834	130	1639	221	64	37	75	264	127	160	38	965	8	56
S22	Local recurrence	primary		34266	13829	4053	856	130	46	12	5	5	5	12	12	1	4	9367	4741	6142	320	257	1708	543	2476	11561	395	543	3014	42	1609	42	702	33629	139	833	133	330	238	75	34	25	350	136	67	41	1892	21	504
S23	Local recurrence	primary	P12	36246	14445	4206	956	116	58	10	7	1	7	11	12	1	4	7633	2063	2276	82	95	691	219	1214	3338	178	183	1084	12	1029	30	173	1606	35	207	61	220	100	31	42	22	201	47	67	21	249	7	139
S25	Local recurrence	primary	P13	28697	11499	3361	662	93	48	8	3	4	3	6	3	1	2	13229	2614	3527	467	165	822	425	1302	5443	220	239	1194	25	1450	28	287	3814	52	204	39	416	93	15	16	26	91	55	41	6	362	71	134
S26	Local recurrence	primary	P14	27877	11556	3416	672	99	49	9	6	5	2	5	9	2	3	8710	1995	5572	431	167	989	444	1959	7108	233	167	845	47	1860	119	233	11813	57	79	90	753	266	43	44	38	96	83	60	26	63	15	129
S27	Local recurrence	primary	P15	31127	10588	2852	678	89	44	6	5	7	3	3	4	1	2	5890	2849	2936	181	152	697	270	996	3489	213	157	1587	26	1145	20	558	3150	143	392	60	474	131	12	34	24	117	100	29	5	1407	4	226
S28	Local recurrence	primary	P16	30689	11369	3098	720	105	53	8	5	6	4	11	9	1	2	13868	5862	4434	295	226	2254	565	2196	10575	640	830	3678	46	2502	31	1469	6435	206	260	45	296	197	41	38	30	420	129	67	22	1467	27	281
S29	Local recurrence	primary	P17	31546	11028	3194	731	111	45	10	7	5	6	12	10	1	2	26357	11988	18326	302	773	1699	1636	1779	12316	961	1238	8201	665	2546	303	99	28352	161	169	889	214	857	365	193	254	368	323	4117	332	2466	577	146
S30	Local recurrence	primary	P18	24848	9615	2932	610	67	50	17	4	11	6	12	7	2	2	7492	2264	3497	222	102	1214	297	3457	7215	228	73	1831	20	1348	39	377	1062	71	324	344	316	165	59	28	26	134	94	73	22	544	21	271
S31	Local recurrence	primary		26354	10564	3308	719	68	37	6	6	5	2	15	7	2	3	11387	3516	5984	92	185	1745	361	1415	3992	182	258	2602	12	1089	14	147	1250	100	231	41	424	136	17	25	35	199	71	50	11	2924	63	169
S32	Local recurrence	primary	P19	25447	9486	2728	632	87	53	9	3	4	2	4	4	0	2	7359	1280	4759	138	150	763	543	1327	6368	270	244	722	43	1859	20	475	5705	58	682	59	222	89	10	56	22	117	29	71	13	917	107	201
S33	Local recurrence	primary		29111	11259	3092	655	74	45	4	1	0	2	4	7	0	0	4211	1373	1978	39	100	783	263	520	3752	122	118	823	8	409	41	38	68	36	306	478	424	145	47	34	28	125	105	112	18	420	6	78
S4	Local recurrence	primary	P1	25321	9772	3100	641	96	34	7	2	7	5	17	5	0	2	8744	2644	3406	165	148	1126	312	2595	6868	298	208	1797	25	1095	28	237	7862	64	334	55	504	107	33	33	19	284	47	58	10	874	188	190
S5	Local recurrence	primary	P2	27914	11385	3568	786	82	53	8	6	5	4	7	5	5	3	9175	4850	5053	146	160	1582	374	2151	5634	285	279	3354	31	1283	34	411	2014	53	306	64	382	105	33	23	28	440	64	71	16	299	20	253
S6	Local recurrence	primary	P3	33517	11532	3439	715	86	65	8	1	4	4	8	4	4	3	3976	1309	1884	88	74	646	162	1290	3654	169	115	1045	26	555	8	89	347	55	253	21	144	33	14	33	9	127	21	51	7	176	89	120
S7	Local recurrence	primary	P4	33243	11524	3444	724	105	41	11	7	1	1	9	5	2	4	2760	1887	1157	185	78	680	198	1068	2405	174	79	896	34	1257	7	246	3994	35	387	18	41	34	9	15	14	33	4	8	3	429	17	151
S8	Local recurrence	primary	P5	22668	9004	2831	597	58	46	6	3	6	5	13	5	3	3	2554	2344	2292	138	161	1134	276	901	3323	188	109	1369	43	927	16	308	4449	383	769	96	195	118	25	42	39	81	44	49	23	867	53	309
S9	Local recurrence	primary	P6	26671	11325	3563	738	101	59	8	12	6	7	7	13	4	6	3876	2157	1883	146	158	938	284	1407	3626	218	91	2031	28	953	17	486	18923	31	282	21	237	61	15	29	38	56	37	31	15	630	10	170
[truncated: 64 more columns]
